# Supplementary material
Source: HighWire-hosted journal article supplement (https://bjo.bmj.com/content/107/6/862)
Supplement: inline-supplementary-material-1 [file inline-supplementary-material-1.pdf]

1 **Supplemental Material**

2           The Root Mean Square of individual Ocular and Corneal Higher-order  
3 Aberrations of Pooled Population and Difference Among Different Age Groups at  
4 baseline was listed in Supplementary Table 1. When comparing the individual Zernike  
5 coefficients, RMS of Ocular and corneal spherical HOA increased in the older group.  
6 RMS of ocular primary vertical comatic aberrations ( $Z_3^{-1}$ ) were found to have  
7 increased from 0.09 $\mu\text{m}$  to 0.21 $\mu\text{m}$ , while corneal primary vertical comatic aberrations  
8 ( $Z_3^{-1}$ ) increased from 0.14 $\mu\text{m}$  to 0.17 $\mu\text{m}$  with age. RMS of ocular primary vertical  
9 trefoil aberrations ( $Z_3^{-3}$ ) were found to have increased from 0.10 $\mu\text{m}$  to 0.12 $\mu\text{m}$ , while  
10 corneal primary vertical trefoil aberrations ( $Z_3^{-3}$ ) increased from 0.12 $\mu\text{m}$  to 0.13 $\mu\text{m}$   
11 with age. These findings were in line with the trends in individual Zernike terms  
12 evaluated in the forms of mean values.

13           **SUPPLEMENTARY TABLE 1 RMS of individual Ocular and Corneal Higher-order**  
14 **Aberrations of Pooled Population and Difference Among Different Age Groups at baseline**

| Parameters            | Total<br>(n=458) | Age, years           |                  |                  |
|-----------------------|------------------|----------------------|------------------|------------------|
|                       |                  | $\leq 12$<br>(n=146) | 13-15<br>(n=209) | 16-18<br>(n=103) |
| Ocular, $\mu\text{m}$ |                  |                      |                  |                  |
| $Z_4^0$               | 0.08             | 0.08                 | 0.08             | 0.08             |
| $Z_6^0$               | 0.01             | 0.01                 | 0.01             | 0.01             |
| $Z_3^{-1}$            | 0.19             | 0.18                 | 0.18             | 0.21             |
| $Z_3^1$               | 0.09             | 0.09                 | 0.09             | 0.09             |
| $Z_5^{-1}$            | 0.03             | 0.02                 | 0.03             | 0.03             |
| $Z_5^1$               | 0.01             | 0.01                 | 0.01             | 0.01             |

|                        |      |      |      |      |
|------------------------|------|------|------|------|
| $Z_3^{-3}$             | 0.10 | 0.10 | 0.09 | 0.12 |
| $Z_3^3$                | 0.08 | 0.09 | 0.08 | 0.08 |
| $Z_5^{-3}$             | 0.02 | 0.02 | 0.02 | 0.02 |
| $Z_5^3$                | 0.01 | 0.01 | 0.01 | 0.01 |
| Corneal, $\mu\text{m}$ |      |      |      |      |
| $Z_4^0$                | 0.11 | 0.09 | 0.11 | 0.11 |
| $Z_6^0$                | 0.02 | 0.02 | 0.02 | 0.02 |
| $Z_3^{-1}$             | 0.15 | 0.14 | 0.14 | 0.17 |
| $Z_3^1$                | 0.08 | 0.08 | 0.08 | 0.09 |
| $Z_5^{-1}$             | 0.03 | 0.03 | 0.03 | 0.03 |
| $Z_5^1$                | 0.02 | 0.02 | 0.02 | 0.01 |
| $Z_3^{-3}$             | 0.12 | 0.12 | 0.12 | 0.13 |
| $Z_3^3$                | 0.09 | 0.10 | 0.09 | 0.09 |
| $Z_5^{-3}$             | 0.04 | 0.04 | 0.03 | 0.03 |
| $Z_5^3$                | 0.03 | 0.02 | 0.02 | 0.03 |

15 Abbreviations: RMS: Root Mean Square;

16

17 Marked changes in ocular primary horizontal comatic aberrations ( $Z_3^1$ ) (from 0.11  $\mu\text{m}$   
 18 to 0.08  $\mu\text{m}$ ) and corneal primary horizontal comatic aberrations ( $Z_3^1$ ) (from 0.11  $\mu\text{m}$  to  
 19 0.06  $\mu\text{m}$ ) were observed in our high-myopia cohort, which was also in line with the  
 20 mean value changes of individual Zernike terms (Supplementary Table 2) .

21

22 **SUPPLEMENTARY TABLE 2 RMS of Higher-order Aberrations of the Pooled**  
 23 **Population at Different Visits**

| Parameters | Baseline<br>(n=99)    | First year<br>(n=99)  | Baseline<br>(n=99)     | First year<br>(n=99)   |
|------------|-----------------------|-----------------------|------------------------|------------------------|
|            | Ocular, $\mu\text{m}$ | Ocular, $\mu\text{m}$ | Corneal, $\mu\text{m}$ | Corneal, $\mu\text{m}$ |
| $Z_4^0$    | 0.08                  | 0.07                  | 0.10                   | 0.11                   |
| $Z_6^0$    | 0.01                  | 0.01                  | 0.02                   | 0.02                   |
| $Z_3^{-1}$ | 0.17                  | 0.18                  | 0.13                   | 0.14                   |
| $Z_3^1$    | 0.11                  | 0.08                  | 0.11                   | 0.06                   |
| $Z_5^{-1}$ | 0.03                  | 0.03                  | 0.03                   | 0.02                   |
| $Z_5^1$    | 0.01                  | 0.01                  | 0.01                   | 0.02                   |
| $Z_3^{-3}$ | 0.11                  | 0.10                  | 0.15                   | 0.12                   |
| $Z_3^3$    | 0.09                  | 0.10                  | 0.10                   | 0.10                   |
| $Z_5^{-3}$ | 0.02                  | 0.01                  | 0.04                   | 0.03                   |
| $Z_5^3$    | 0.01                  | 0.01                  | 0.03                   | 0.03                   |

24 Abbreviations: RMS: Root Mean Square

25
